# Supplementary material for: Global dietary calcium intake among adults: a systematic review
Source: Springer Nature journal article supplement (doi:10.1007/s00198-017-4230-x), 2017-10-12
Supplement: MOESM2 [file 15129244]

**Appendix B. Rejected articles**

| **Pubmed or source id** | **Authors** | **Title** | **Country** | **Rejection Reason** |
| --- | --- | --- | --- | --- |
| 25936381 | Adegboye, Amanda R. A. and Boucher, Barbara J. and Kongstad, Johanne and Fiehn, Nils-Erik and Christensen, Lisa B. and Heitmann, Berit L. | Calcium, vitamin D, casein and whey protein intakes and periodontitis among Danish adults | Denmark | Better reporting elsewhere |
| 22529769 | Knudsen | Evaluation of dietary intake in Danish adults by means of an index based on food-based dietary guidelines 2012 | Denmark | Better reporting elsewhere |
| 19888277 | Orfanos | Eating out of home: energy, macro- and micronutrient intakes in 10 European countries. The European Prospective Investigation into Cancer and Nutrition 2009 | Denmark (3918), France (4639), Germany (4418), Greece (2686), Italy (3956), Netherlands (3984), Norway (1798), Spain (3220), Sweden (6050), UK (1286) | Better reporting elsewhere |
| 20011225 | Flynn, Albert and Hirvonen, Tero and Mensink, Gert B. M. and OckÃ©, Marga C. and Serra-Majem, Lluis and Stos, Katarzyna and Szponar, Lucjan and Tetens, Inge and Turrini, Aida and Fletcher, Reg and Wildemann, Tanja | Intake of selected nutrients from foods, from fortification and from supplements in various European countries | Denmark, Germany, Finland, Ireland, Italy, the Netherlands, Poland, Spain and the United Kingdom | Better reporting elsewhere |
| 22761771 |  | Dietary fibre intake and risks of cancers of the colon and rectum in the European prospective investigation into cancer and nutrition (EPIC) 2012 | Europe | Better reporting elsewhere |
|  | Kalonji, E. and Sirot, V. and Noel, L. and Guerin, T. and Margaritis, I. and Leblanc, J. C. | Nutritional risk assessment of eleven minerals and trace elements: prevalence of inadequate and excessive intakes from the second French Total Diet Study | France | Better reporting elsewhere |
| 20153274329 | Hartmann | The German Nutrient Database: effect of different versions on the calculated energy and nutrient intake of the German population 2015 | Germany | Better reporting elsewhere |
| 26299577 | Lee SE1, Song YJ2, Kim Y3, Choe J3, Paik HY1. | Household food insufficiency is associated with dietary intake in Korean adults 2016 | South Korea | Better reporting elsewhere |
| 16088096 |  | The relation between dietary protein, calcium and bone health in women: results from the EPIC-Potsdam cohort 2005 | Germany | BMD |
| 24575664 |  | Bone health status and lipid profile among post-menopausal malay women in Cheras, Kuala Lumpur 2012 | Malaysia | BMD |
| 25496564 |  | Association between dietary calcium and phosphorus intakes, dietary calcium/phosphorus ratio and bone mass in the Korean population 2014 | South Korea | BMD |
| 15702591 | Wagner | The role of fortified foods--situation in Austria 2005 | Austria | Ca data not mg/day (or equivalent) |
| 20881077 | Arimond M1, Wiesmann D, Becquey E, Carriquiry A, Daniels MC, Deitchler M, Fanou-Fogny N, Joseph ML, Kennedy G, Martin-Prevel Y, Torheim LE. | Simple food group diversity indicators predict micronutrient adequacy of women's diets in 5 diverse, resource-poor settings 2010 | Bangladesh | Ca data not mg/day (or equivalent) |
| 23703262 |  | Macronutrient consumption and inadequate micronutrient intake in adults 2013 | Brazil | Ca data not mg/day (or equivalent) |
| 21269014 |  | Combining nutrient intake from food/beverages and vitamin/mineral supplements 2010 | Canada | Ca data not mg/day (or equivalent) |
| 22298574 |  | A comparison of micronutrient inadequacy and risk of high micronutrient intakes among vitamin and mineral supplement users and nonusers in Canada 2012 | Canada | Ca data not mg/day (or equivalent) |
| 25411304 | Atalah | Does Chile's nutritional situation constitute a double burden? 2014 | Chile | Ca data not mg/day (or equivalent) |
| 21624323 | Liu AD1, Zhang B, DU WW, Wang HJ, Su C, Zhai FY. | [Milk consumption and its changing trend of Chinese adult aged 18 - 44 in nine provinces (autonomous region) from 1991 to 2006] 2011 | China | Ca data not mg/day (or equivalent) |
| 12830368 | Saw, Seang-Mei and Hong, Ching-Ye and Lee, Jeanette and Wong, Mee-Lian and Chan, Mei-Fen and Cheng, Angela and Leong, Keng-Hong | Awareness and health beliefs of women towards osteoporosis | China | Ca data not mg/day (or equivalent) |
| 61232802 | Porrata-Maury, Carmen | CONSUMO Y PREFERENCIAS ALIMENTARIAS DE LA POBLACIÃ“N CUBANA CON 15 Y MÃS AÃ‘OS DE EDAD | Cuba | Ca data not mg/day (or equivalent) |
| 18382426 | Allen | Animal foods, protein, calcium and prostate cancer risk: the European Prospective Investigation into Cancer and Nutrition 2008 | Denmark, France, Germany, Greece, Italy, the Netherlands, Norway, Spain, Sweden and the United Kingdom | Ca data not mg/day (or equivalent) |
| 20513261 | Pietinen, Pirjo and Paturi, Merja and Reinivuo, Heli and Tapanainen, Heli and Valsta, Liisa M. | FINDIET 2007 Survey: energy and nutrient intakes | Finland | Ca data not mg/day (or equivalent) |
| 15369026 | Geleijnse JM | Impact of dietary and lifestyle factors on the prevalence of hypertension in Western populations 2004 | Finland, Italy, the Netherlands, United Kingdom (UK) and USA | Ca data not mg/day (or equivalent) |
| 17607953 | Touvier | Vitamin and mineral inadequacy in the French population: estimation and application for the optimization of food fortification 2006 | France | Ca data not mg/day (or equivalent) |
| 22177978 | Giannouli | Determinants of quality of life in Greek middle-age women: a population survey 2012 | Greece | Ca data not mg/day (or equivalent) |
| 25768954 | Manios Y | Food group and micronutrient intake adequacy among children, adults and elderly women in Greece 2015 | Greece | Ca data not mg/day (or equivalent) |
| 16672213 |  | Concordance of diets and eating practices in a rural Guatemalan setting with the cancer prevention recommendations of the World Cancer Research Fund: estimates from existing dietary intake 2006 | Guatemala | Ca data not mg/day (or equivalent) |
|  | Ramachandran (in Kennedy 2006 part 2) | The double burden of malnutrition in India. In The double burden of malnutrition: Case studies from six developing countries. FAO Food and Nutrition Paper 84 | India | Ca data not mg/day (or equivalent) |
| 17764604 | Azadbakht | Dietary and non-dietary determinants of central adiposity among Tehrani women 2008 | Iran | Ca data not mg/day (or equivalent) |
|  | van Riet, H. van | The role of street foods in the diet of low-income urban residents, the case of Nairobi | Kenya | Ca data not mg/day (or equivalent) |
| 24015237 | Roodenburg | Modelling of usual nutrient intakes: potential impact of the choices programme on nutrient intakes in young dutch adults 2013 | Netherlands | Ca data not mg/day (or equivalent) |
| 18537058 | Waśkiewicz | Quality of nutrition and health knowledge in subjects with diagnosed cardio-vascular diseases in the Polish population--National Multicentre Health Survey (WOBASZ) 2008 | Poland | Ca data not mg/day (or equivalent) |
| 25658237 | Varela-Moreiras | Evaluation of food consumption and dietary patterns in Spain by the Food Consumption Survey: updated information | Spain | Ca data not mg/day (or equivalent) |
| 21176241 | Hekimsoy | Vitamin D status among adults in the Aegean region of Turkey 2010 | Turkey | Ca data not mg/day (or equivalent) |
|  | Church, S. M. | Diet and nutrition in low-income households - key findings of a national survey | UK | Ca data not mg/day (or equivalent) |
| 20113382383 | Ruxton | The role of micronutrients in healthy ageing 2011 | UK | Ca data not mg/day (or equivalent) |
| 15831121 | Swan G | Findings from the latest National Diet and Nutrition Survey 2004 | UK | Ca data not mg/day (or equivalent) |
| 25763533 | Tayyem | Macro- and micronutrients consumption and the risk for colorectal cancer among Jordanians 2015 | Jordan | Case control study |
| 11282184 | Monge-Rojas, R. | Marginal vitamin and mineral intake of Costa Rican adolescents. | Costa Rica | Child study |
|  | Steyn (in Kennedy 2006, part 3) | Dietary changes and the health transition in South Africa: implications for health policy. In The double burden of malnutrition: Case studies from six developing countries. FAO Food and Nutrition Paper 84 | South Africa | Child study |
| 25639133 |  | Food crop production, nutrient availability, and nutrient intakes in Bangladesh: exploring the agriculture-nutrition nexus with the 2010 Household Income and Expenditure Survey 2014 | Bangladesh | Crop/market food data |
| 27222421 | Mark | Estimating dietary micronutrient supply and the prevalence of inadequate intakes from national Food Balance Sheets in the South Asia regiona 2016 | Bangladesh, India, Iran, Maldives, Nepal, Pakistan, Sri Lanka | Crop/market food data |
| 23193773 | Gibson | Using reference nutrient density goals with food balance sheet data to identify likely micronutrient deficits for fortification planning in countries in the Western Pacific region 2012 | Cambodia, North Korea, China, Fiji, Kiribati, South Korea, Laos, Philippines, Solomon Islands, Vanuatu, and Viet Nam | Crop/market food data |
| 20133053461 |  | Dietary requirements for magnesium, but not calcium, are likely to be met in Malawi based on national food supply data 2012 | Malawi | Crop/market food data |
| 20023149898 |  | Estimation of daily micronutrient intake of Filipinos. (Use of Nuclear and Isotopic Techniques for Addressing Nutritional Problems) 2002 | Philippines | Crop/market food data |
| 45160785 | Natalie, D. and Neumann, C. G. | MICRONUTRIENT DEFICIENCIES IN FOOD AID BENEFICIARIES: A REVIEW OF SEVEN AFRICAN COUNTRIES | Africa, 7 countries | Duplicate data |
| 26061017 | Auestad | Contribution of Food Groups to Energy and Nutrient Intakes in Five Developed Countries 2015 | Australia | Duplicate data |
| 20033184307 |  | Evaluation of micronutrient intakes of older Australians: the National Nutrition Survey - 1995 2001 | Australia | Duplicate data |
|  | Araujo, Marina Campos, Junger, Washington Leite, Barbosa, FlÃ¡via dos Santos, Bezerra, Ilana Nogueira, Yokoo, Edna Massae, Sichieri, Rosely, Pereira, Rosangela Alves | Consumo de macronutrientes e ingestÃ£o inadequada de micronutrientes em adultos | Brazil | Duplicate data |
| 20143395060 |  | Independent associations of income and education with nutrient intakes in Brazilian adults: 2008-2009 National Dietary Survey 2014 | Brazil | Duplicate data |
| 23312136 | Mensink GB1, Fletcher R, Gurinovic M, Huybrechts I, Lafay L, Serra-Majem L, Szponar L, Tetens I, Verkaik-Kloosterman J, Baka A, Stephen AM. | Mapping low intake of micronutrients across Europe 2013 | Denmark | Duplicate data |
| 16925886 | Hirvonen | Efficacy and safety of food fortification with calcium among adults in Finland 2006 | Finland | Duplicate data |
| 16925886 | Tero, Hirvonen and Heli, Tapanainen and Liisa, Valsta and Marja-Leena, Hannila and Antti, Aro and Pirjo, Pietinen | Efficacy and safety of food fortification with calcium among adults in Finland | Finland | Duplicate data |
| 22695968 | Iannotti, Lora L. and Robles, Miguel and PachÃ³n, Helena and Chiarella, Cristina | Food Prices and Poverty Negatively Affect iVIicronutrient intakes in Guatemaia | Guatemala | Duplicate data |
|  | Barquera, SimÃ³n, Rivera, Juan A., Espinosa, Juan, Campos-Nonato, Ismael, HernÃ¡ndez-Barrera, LucÃ­a, J, Armando Barriguete, Flores, Mario | Energy and nutrient consumption in adults: analysis of the Mexican National Health and Nutrition Survey 2006 | Mexico | Duplicate data |
| 20795426 |  | [Comparison of the calcium intake during and before Ramadan in Marrakesh, Morocco] 2010 | Morocco | Duplicate data |
| 24129027 | Hamdan, May and Monteagudo, Celia and Lorenzo-Tovar, Maria-Luisa and Tur, JosÃ©-Antonio and Olea-Serrano, Fatima and Mariscal-Arcas, Miguel | Development and validation of a nutritional questionnaire for the Palestine population | Palestine | Duplicate data |
| 27222421 | Mark, H. E. and Houghton, L. A. and Gibson, R. S. and Monterrosa, E. and Kraemer, K. | Estimating dietary micronutrient supply and the prevalence of inadequate intakes from national Food Balance Sheets in the South Asia region | South Asia | Duplicate data |
| 20083190173. Publica | Nguyen Cong, Khan and Le Bach, Mai and Vu Thi Thu, Hien and Nguyen Thi, Lam and Vu Quynh, Hoa and Tuan Mai, Phuong and Bui Thi, Nhung and Nakamori, M. and Shimizu, Y. and Yamamoto, S. | Development and validation of food frequency questionnaire to assess calcium intake in postmenopausal Vietnamese women | Vietnam | Duplicate data |
| 25693435 | Crovetto, Mirta M. and Uauy, Ricardo | [Changes in the consumption of dairy products, sugary drinks and processed juices in the Chilean population] | Chile | From specific food source |
| 102442785 | JurkoviÄ†, Martina and SokoliÄ†, Darja and BaÅ IÄ†, Sandra and Gross-BoÅ KoviÄ†, Andrea and KenjeriÄ†, Daniela | Contribution of fresh fruit consumption to the micronutrient intake in Zagreb region adults | Croatia | From specific food source |
| 12003656 | Burns C1, Jackson M, Gibbons C, Stoney RM. | Foods prepared outside the home: association with selected nutrients and body mass index in adult Australians 2002 | Australia | Less restrictive available |
| 27581583 | Leech, Rebecca M. and Livingstone, Katherine M. and Worsley, Anthony and Timperio, Anna and McNaughton, Sarah A. | Meal Frequency but Not Snack Frequency Is Associated with Micronutrient Intakes and Overall Diet Quality in Australian Men and Women | Australia | Less restrictive available |
| 21085900 | Zhu | Adequacy and change in nutrient and food intakes with aging in a seven-year cohort study in elderly women 2010 | Australia | Less restrictive available |
| 11753486 |  | Evaluation of micronutrient intakes of older Australians: The National Nutrition Survey--1995 2001 | Australia | Less restrictive available |
| 20881083 | Joseph ML1, Carriquiry A. | A measurement error approach to assess the association between dietary diversity, nutrient intake, and mean probability of adequacy 2010 | Bangladesh | Less restrictive available |
| 15762314 |  | Gender differences in food and energy intake among adult villagers in northwestern Bangladesh: a food frequency questionnaire survey 2004 | Bangladesh | Less restrictive available |
| 18339055 | Sharma | Assessing dietary patterns in Barbados highlights the need for nutritional intervention to reduce risk of chronic disease 2008 | Barbados | Less restrictive available |
| 18382082 | Fabian | Nutritional situation of the elderly in the European Union: data of the European Nutrition and Health Report (2004) 2008 | Belgium | Less restrictive available |
| 15054406 | Matthys C | Validity and reproducibility of a computerised tool for assessing the iron, calcium and vitamin C intake of Belgian women 2004 | Belgium | Less restrictive available |
| 19178745 |  | Nutrient intakes related to osteoporotic fractures in men and women--the Brazilian Osteoporosis Study (BRAZOS) 2009 | Brazil | Less restrictive available |
| 23422543 |  | Prevalence and correlates of calcium and vitamin D status adequacy in adolescents, adults, and elderly from the Health Survey-Sao Paulo 2013 | Brazil | Less restrictive available |
| 20881079 | Becquey E1, Martin-Prevel Y. | Micronutrient adequacy of women's diet in urban Burkina Faso is low 2010 | Burkina Faso | Less restrictive available |
| 20881076 | Martin-Prevel, Yves and Becquey, Elodie and Arimond, Mary | Food group diversity indicators derived from qualitative list-based questionnaire misreported some foods compared to same indicators derived from quantitative 24-hour recall in urban Burkina Faso | Burkina Faso | Less restrictive available |
| 27265306 | Fungo, Robert and Muyonga, John and Kabahenda, Margaret and Kaaya, Archileo and Okia, Clement A. and Donn, Pauline and Mathurin, Tchatat and Tchingsabe, Obadia and Tiegehungo, Julius C. and Loo, Judy and Snook, Laura | Contribution of forest foods to dietary intake and their association with household food insecurity: a cross-sectional study in women from rural Cameroon | Cameroon | Less restrictive available |
| 21730217 | Ferland | Dairy product intake and its association with body weight and cardiovascular disease risk factors in a population in dietary transition 2011 | Canada | Less restrictive available |
| 22106784 | Garriguet | Bone health: osteoporosis, calcium and vitamin D 2011 | Canada | Less restrictive available |
| 22916812 |  | Pulse consumption in Canadian adults influences nutrient intakes 2012 | Canada | Less restrictive available |
| 23173176 |  | Consumption of breakfast and the type of breakfast consumed are positively associated with nutrient intakes and adequacy of Canadian adults 2013 | Canada | Less restrictive available |
| 20513282 | Dang | [Study on the dietary pattern assessed with semi-quantitative food frequency questionnaire among rural Tibetan women with children younger than 2 years in Lhasa city] 2010 | China | Less restrictive available |
| 26564700 | Du | [Trend of dietary nutrient intake among adult females in 9 provinces in China, 2000-2011] 2015 | China | Less restrictive available |
| 17392135 | Zhai F1, Wang H, Du S, He Y, Wang Z, Ge K, Popkin BM. | Lifespan nutrition and changing socio-economic conditions in China 2007 | China | Less restrictive available |
| 23290894 | Zhang J1, Wang HJ, Wang ZH, Zhang JG, Du WW, Su C, Zhai FY, Zhang B. | [Trend in dietary calcium intake among Chinese elderly aged 50 years and over in nine provinces, from 1991 to 2009] 2012 | China | Less restrictive available |
| 20133179075 |  | The nutrition and health status of residents in Gaogang district of Taizhou in 2010 2013 | China | Less restrictive available |
| 20143337913 |  | Analysis of the nutrition and health status of residents in Xinhua district of Shijiazhuang in 2010 2014 | China | Less restrictive available |
| 17219883 | Shabayek MM1, Saleh SI | Nutritional status of institutionalized and free-living elderly in Alexandria 2000 | Egypt | Less restrictive available |
| 22796715 | Vernay M1, Aïdara M, Salanave B, Deschamps V, Malon A, Oleko A, Mallion JM, Hercberg S, Castetbon K. | Diet and blood pressure in 18-74-year-old adults: the French Nutrition and Health Survey (ENNS, 2006-2007) 2012 | France | Less restrictive available |
| 20185352 |  | Calcium intake and the risk of osteoporosis and fractures in French women 2010 | France | Less restrictive available |
| 20807301 |  | Sociodemographic and economic characteristics associated with dairy intake vary across genders 2011 | France | Less restrictive available |
| 21587278 |  | Regional factors interact with educational and income tax levels to influence food intake in France 2011 | France | Less restrictive available |
| 26934826 | Gose M1, Krems C1, Heuer T1, Hoffmann I | Trends in food consumption and nutrient intake in Germany between 2006 and 2012: results of the German National Nutrition Monitoring (NEMONIT) 2016 | Germany | Less restrictive available |
| 22626900 | Li K1, Kaaks R, Linseisen J, Rohrmann S. | Associations of dietary calcium intake and calcium supplementation with myocardial infarction and stroke risk and overall cardiovascular mortality in the Heidelberg cohort of the European Prospective Investigation into Cancer and Nutrition study (EPIC-Heidelberg) 2012 | Germany | Less restrictive available |
| 22691229 | Troesch B1, Hoeft B, McBurney M, Eggersdorfer M, Weber P | Dietary surveys indicate vitamin intakes below recommendations are common in representative Western countries 2012 | Germany | Less restrictive available |
| 15368091 | Magkos | Development and validation of a food frequency questionnaire for assessing dietary calcium intake in the general population 2006 | Greece | Less restrictive available |
| 25285410 | Manios Y | Micronutrient intakes among children and adults in Greece: the role of age, sex and socio-economic status 2014 | Greece | Less restrictive available |
| 18497434 | Harinarayan CV1, Ramalakshmi T, Prasad UV, Sudhakar D | Vitamin D status in Andhra Pradesh : a population based study 2008 | India | Less restrictive available |
| 17162327 |  | Reproducibility and validity of an interviewer-administered semi-quantitative food frequency questionnaire to assess dietary intake of urban adults in southern India 2006 | India | Less restrictive available |
| 20133129852 | Bondarianzadeh | Nutritional adequacy in relation to household food expenditure in Tehran 2013 | Iran | Less restrictive available |
| 16943458 |  | Dietary diversity within food groups: an indicator of specific nutrient adequacy in Tehranian women 2006 | Iran | Less restrictive available |
| 24950145 | Power | Food and nutrient intake of Irish community-dwelling elderly subjects: who is at nutritional risk? 2014 | Ireland | Less restrictive available |
| 14561044 | Shahar | Development of a semi-quantitative Food Frequency Questionnaire (FFQ) to assess dietary intake of multiethnic populations 2003 | Israel | Less restrictive available |
| 15850961 | Shahar, D., Shai, I., Vardi, H., Shahar, A. and Fraser, D. | Diet and eating habits in high and low socioeconomic groups | Israel | Less restrictive available |
| 15553255 | Riccioni | Food-intake and nutrients pattern in Italian adult male subjects 2004 | Italy | Less restrictive available |
| 19007448 |  | Dietary exposure estimates of twenty-one trace elements from a Total Diet Study carried out in Pavia, Northern Italy 2009 | Italy | Less restrictive available |
| 18398033 |  | Dairy product, saturated fatty acid, and calcium intake and prostate cancer in a prospective cohort of Japanese men 2008 | Japan | Less restrictive available |
| 19515740 |  | Relations between protein intake and blood pressure in Japanese men and women: the Circulatory Risk in Communities Study (CIRCS) 2009 | Japan | Less restrictive available |
| 21077344 |  | [Nutritional factors influencing the incidence of new dialysis due to diabetes mellitus in each prefecture of Japan] 2010 | Japan | Less restrictive available |
| 25837213 |  | Dietary intake of minerals in relation to depressive symptoms in Japanese employees: the Furukawa Nutrition and Health Study 2015 | Japan | Less restrictive available |
| 12186659 | van't Riet, Hilda and den Hartog, Adel P. and van Staveren, Wija A. | Non-home prepared foods: contribution to energy and nutrient intake of consumers living in two low-income areas in Nairobi | Kenya | Less restrictive available |
|  | Barquera (in Kennedy 2006 part 2) | Food consumption, food expenditure, anthropometric status and nutritionrelated diseases in Mexico. In The double burden of malnutrition: Case studies from six developing countries. FAO Food and Nutrition Paper 84 | Mexico | Less restrictive available |
| 24124890 |  | Dietary quality indices vary with sociodemographic variables and anthropometric status among Mexican adults: a cross-sectional study. Results from the 2006 National Health and Nutrition Survey 2014 | Mexico | Less restrictive available |
| 22818824 | van Lee, L and Geelen, A. and Huysduynen, E. J. C. H. van and Vries, J. H. M. de and Veer, P. van't and Feskens, E. J. M. | The Dutch Healthy Diet index (DHD-index): an instrument to measure adherence to the Dutch Guidelines for a Healthy Diet | Netherlands | Less restrictive available |
| 24519410 | Sluijs | Intakes of potassium, magnesium, and calcium and risk of stroke 2014 | Netherlands (EPIC) | Less restrictive available |
| 20153075935 | Parackal | A profile of New Zealand 'Asian' participants of the 2008/09 Adult National Nutrition Survey: focus on dietary habits, nutrient intakes and health outcomes 2015 | New Zealand | Less restrictive available |
| 12074182 |  | Assessment of a rapid method for assessing adequacy of calcium intake 2002 | New Zealand | Less restrictive available |
| 26481949 |  | Nut consumption is associated with better nutrient intakes: results from the 2008/09 New Zealand Adult Nutrition Survey 2016 | New Zealand | Less restrictive available |
| 11855355 |  | Determinants of health and nutritional status of rural Nigerian women 2001 | Nigeria | Less restrictive available |
| 18846781 |  | Nutritional knowledge, nutrients intake and nutritional status of hypertensive patients in Ondo State, Nigeria 2008 | Nigeria | Less restrictive available |
| 19763025 |  | Daily calcium intake and physical activity status in urban women living on low incomes in Davao, Philippines: a primary study for osteoporosis prevention 2009 | Philippines | Less restrictive available |
| 22390143 | Dehghan | Development, reproducibility and validity of the food frequency questionnaire in the Poland arm of the Prospective Urban and Rural Epidemiological (PURE) study 2012 | Poland | Less restrictive available |
| 25097513 | Kostecka, MaÅ‚gorzata | The role of healthy diet in the prevention of osteoporosis in perimenopausal period | Poland | Less restrictive available |
| 18053293 | Camoes | Dietary intake and different types of physical activity: full-day energy expenditure, occupational and leisure-time 2008 | Portugal | Less restrictive available |
| 25632339 | Wang Y, Li S | Worldwide Trends in Dairy Production and Consumption and Sustainable Solution for the Worldwide Calcium Intake Inadequacy Problem? | Russia, US, UK, India, and China. | Less restrictive available |
| 16153329 | Vorster | The nutrition and health transition in the North West Province of South Africa: a review of the THUSA (Transition and Health during Urbanisation of South Africans) study 2005 | South Africa | Less restrictive available |
| 19565971 |  | An analysis of dietary micronutrient intakes in two age groups of black South African women 2008 | South Africa | Less restrictive available |
| 23952977 |  | The use of predefined diet quality scores in the context of CVD risk during urbanization in the South African Prospective Urban and Rural Epidemiological (PURE) study 2014 | South Africa | Less restrictive available |
| 24568797 |  | Dietary intake, nutrition, and fetal alcohol spectrum disorders in the Western Cape Province of South Africa 2014 | South Africa | Less restrictive available |
| 20153149911 | Bae | Evaluation of nutrient and food intake status, and dietary quality according to abdominal obesity based on waist circumference in Korean adults: based on 2010-2012 Korean National Health and Nutrition Examination Survey 2014 | South Korea | Less restrictive available |
| 24925973 | Kwak SM1, Kim JS2, Choi Y1, Chang Y1, Kwon MJ1, Jung JG1, Jeong C1, Ahn J1, Kim HS1, Shin H1, Ryu S2. | Dietary intake of calcium and phosphorus and serum concentration in relation to the risk of coronary artery calcification in asymptomatic adults 2014 | South Korea | Less restrictive available |
| 24849737 |  | Is FEV(1) an indicator of low bone mineral density in adults? The Fifth Korea National Health and Nutrition Examination Survey 2015 | South Korea | Less restrictive available |
| 25524331 |  | Body composition changes were related to nutrient intakes in elderly men but elderly women had a higher prevalence of sarcopenic obesity in a population of Korean adults 2015 | South Korea | Less restrictive available |
| 25837195 |  | Dietary calcium and Framingham Risk Score in vitamin D deficient male (KNHANES 2009-2011) 2015 | South Korea | Less restrictive available |
| 20113101883 |  | Dietary factors related to hypertension risk in Korean adults-data from the Korean national health and nutrition examination survey III 2011 | South Korea | Less restrictive available |
| 20113389094 |  | A comparison of food and nutrient intake between instant noodle consumers and non-instant noodle consumers in Korean adults 2011 | South Korea | Less restrictive available |
| 20153135113 |  | Socio-demographic characteristics, nutrient intakes and mental health status of older Korean adults depending on household food security: based on the 2008-2010 Korea National Health and Nutrition Examination Survey 2015 | South Korea | Less restrictive available |
| 18347748 | Arana | [Prevalence of certain osteoporosis-determining habits among post menopausal women in the Basque Country, Spain, in 2003] 2007 | Spain | Less restrictive available |
| 16967192 | Mataix | Factors influencing the intake and plasma levels of calcium, phosphorus and magnesium in southern Spain 2006 | Spain | Less restrictive available |
| 19594966 | Ribas-Barba L1, Serra-Majem L, Román-Viñas B, Ngo J, García-Alvarez A. | Effects of dietary assessment methods on assessing risk of nutrient intake adequacy at the population level: from theory to practice 2009 | Spain | Less restrictive available |
| 18641194 | Schroder | Low energy density diets are associated with favorable nutrient intake profile and adequacy in free-living elderly men and women 2008 | Spain | Less restrictive available |
| 19594961 | Serra-Majem | Dietary patterns and nutritional adequacy in a Mediterranean country 2009 | Spain | Less restrictive available |
| 11813083 |  | Vitamins and mineral intake in elderly people from Extremadura 2002 | Spain | Less restrictive available |
| 15692261 |  | Mediterranean diet and health: is all the secret in olive oil? 2003 | Spain | Less restrictive available |
| 16395510 |  | Dietary intake and nutritional risk among free-living elderly people in Palma de Mallorca 2005 | Spain | Less restrictive available |
| 16582030 |  | The contribution of ready-to-eat cereals to daily nutrient intake and breakfast quality in a Mediterranean setting 2006 | Spain | Less restrictive available |
| 17988407 |  | Trends in energy and nutrient intake and risk of inadequate intakes in Catalonia, Spain (1992-2003) 2007 | Spain | Less restrictive available |
| 24984996 |  | Ten-year trends in compliance with the current Spanish nutritional objectives in Balearic Islands adult population (2000-2010) 2014 | Spain | Less restrictive available |
| 17973728 | Angbratt | Prevalence and correlates of insufficient calcium intake in a Swedish population 2007 | Sweden | Less restrictive available |
| 24456871 | Kaluza | Heme iron intake and acute myocardial infarction: a prospective study of men 2014 | Sweden | Less restrictive available |
| 17381900 | Key | Calcium, diet and fracture risk: a prospective study of 1898 incident fractures among 34 696 British women and men 2007 | UK | Less restrictive available |
| 15877913 | Roddam | Reproducibility of a short semi-quantitative food group questionnaire and its performance in estimating nutrient intake compared with a 7-day diet diary in the Million Women Study 2005 | UK | Less restrictive available |
| 15877913 | Roddam, Andrew | Reproducibility of a short semi-quantitative food group questionnaire and its performance in estimating nutrient intake compared with a 7-day diet diary in the Million Women Study | UK | Less restrictive available |
| 21736781 | Whitton C1, Nicholson SK, Roberts C, Prynne CJ, Pot GK, Olson A, Fitt E, Cole D, Teucher B, Bates B, Henderson H, Pigott S, Deverill C, Swan G, Stephen AM. | National Diet and Nutrition Survey: UK food consumption and nutrient intakes from the first year of the rolling programme and comparisons with previous surveys 2011 | UK | Less restrictive available |
| 19141703 |  | Plasma C-peptide is inversely associated with calcium intake in women and with plasma 25-hydroxy vitamin D in men 2009 | US | Less restrictive available |
| 19237724 |  | Dairy food, calcium, and risk of cancer in the NIH-AARP Diet and Health Study 2009 | US | Less restrictive available |
| 22425103 |  | Impact of nutritional factors on incident kidney stone formation: a report from the WHI OS 2012 | US | Less restrictive available |
| 24724766 |  | Multivitamin/mineral supplement contribution to micronutrient intakes in the United States, 2007-2010 2014 | US | Less restrictive available |
| 25599274 |  | Tree nut consumption is associated with better nutrient adequacy and diet quality in adults: National Health and Nutrition Examination Survey 2005-2010 2015 | US | Less restrictive available |
| 25948665 |  | Association between intakes of magnesium, potassium, and calcium and risk of stroke: 2 cohorts of US women and updated meta-analyses 2015 | US | Less restrictive available |
| 26259506 |  | Dietary intake of calcium and magnesium and the metabolic syndrome in the National Health and Nutrition Examination (NHANES) 2001-2010 data 2015 | US | Less restrictive available |
| 26715332 |  | Association of lunch meat consumption with nutrient intake, diet quality and health risk factors in U.S. children and adults: NHANES 2007-2010 2015 | US | Less restrictive available |
| 20143175834 |  | Chickpeas and hummus are associated with better nutrient intake, diet quality, and levels of some cardiovascular risk factors: National Health and Nutrition Examination Survey 2003-2010 2014 | US | Less restrictive available |
| 20163272424 |  | Certain grain food patterns are associated with improved 2015 dietary guidelines shortfall nutrient intakes, diet quality, and lower body weight in US adults: results from the national health and nutrition examination survey, 2005-2010 2016 | US | Less restrictive available |
| 11708605 | Ogle BM1, Hung PH, Tuyet HT. | Significance of wild vegetables in micronutrient intakes of women in Vietnam: an analysis of food variety 2001 | Vietnam | Less restrictive available |
| 20083190173 |  | Development and validation of food frequency questionnaire to assess calcium intake in postmenopausal Vietnamese women 2008 | Vietnam | Less restrictive available |
| 10412503 | Pacin, A. and MartÃ­nez, E. and MartÃ­n de Portela, M. L. and Neira, M. S. | [Food consumption and intake of several nutrients in a population of the University of Lujan, Argentina] | Argentina | More recent available |
|  | Zeni, S. N. and Portela, M. L. de | Nutritional state regarding calcium in Argentina. / Estado nutricional con respecto al calcio en la Argentina | Argentina | More recent available |
| 18156409 | McNaughton | An index of diet and eating patterns is a valid measure of diet quality in an Australian population 2008 | Australia | More recent available |
| 12700621 |  | Food consumption, energy and nutrient intake and nutritional status in rural Bangladesh: changes from 1981-1982 to 1995-96 2003 | Bangladesh | More recent available |
| 23256144 |  | Very low adequacy of micronutrient intakes by young children and women in rural Bangladesh is primarily explained by low food intake and limited diversity 2013 | Bangladesh | More recent available |
| 9731429 | Atalah Samur, Eduardo, Benavides M, Xenia, Avila M, Leticia, Barahona G, Sonia, CÃ¡rdenas A, Rosa | CaracterÃ­sticas alimentarias de adultos mayores de comunas pobres de la RegiÃ³n Metropolitana | Chile | More recent available |
| 9460264 | Castillo L, Cecilia, Atalah Samur, Eduardo, Benavides M, Xenia, Urteaga R, Carmen | Patrones alimentarios en adultos que asisten a consultorios de atenciÃ³n primaria en la regiÃ³n metropolitana | Chile | More recent available |
| 11680960 |  | [Validation of global nutrition assessment in elders] 2001 | Chile | More recent available |
| 20153073776 |  | Changes in the consumption of dairy products, sugary drinks and processed juices in the Chilean population 2014 | Chile | More recent available |
| 2676265 | Yamori, Y. | Preliminary report of cardiac study: cross-sectional multicenter study on dietary factors of cardiovascular diseases. CARDIAC Study Group | china | More recent available |
| 17019716 |  | Dietary intake of calcium, fiber and other micronutrients in relation to colorectal cancer risk: Results from the Shanghai Women's Health Study 2006 | China | More recent available |
| 20093135783 |  | Association between dietary diversity and nutrients adequacy in Chinese adults 2009 | China | More recent available |
| 20113389261 |  | The variation in nutrient intakes and assessment of days and sample sizes needed for survey among adult residents in China 2011 | China | More recent available |
| 20123133644 |  | Assessment of nutrient adequacy of adult residents in China 2012 | China | More recent available |
| 22142665 | Vinas | Projected prevalence of inadequate nutrient intakes in Europe 2011 | Denmark | More recent available |
| 19888269 | Welch | Variation in intakes of calcium, phosphorus, magnesium, iron and potassium in 10 countries in the European Prospective Investigation into Cancer and Nutrition study 2009 | Denmark | More recent available |
| 11896132 | Suojanen | Liberal fortification of foods: the risks. A study relating to Finland 2002 | Finland | More recent available |
| 22618737 | Allen NE1, Appleby PN, Key TJ, Bueno-de-Mesquita HB, Ros MM, Kiemeney LA, Tjønneland A, Roswall N, Overvad K, Weikert S, Boeing H, Chang-Claude J, Teucher B, Panico S, Sacerdote C, Tumino R, Palli D, Sieri S, Peeters P, Quirós JR, Jakszyn P, Molina-Montes E, Chirlaque MD, Ardanaz E, Dorronsoro M, Khaw KT, Wareham N, Ljungberg B, Hallmans G, Ehrnström R, Ericson U, Gram IT, Parr CL, Trichopoulou A, Karapetyan T, Dilis V, Clavel-Chapelon F, Boutron-Ruault MC, Fagherrazzi G, Romieu I, Gunter MJ, Riboli E. | Macronutrient intake and risk of urothelial cell carcinoma in the European prospective investigation into cancer and nutrition 2013 | France | More recent available |
| 12080407 |  | The use of computerised 24 h dietary recalls in the French SU.VI.MAX Study: number of recalls required 2002 | France | More recent available |
| 25527370 | di Giuseppe | Plasma fibroblast growth factor 23 and risk of cardiovascular disease: results from the EPIC-Germany case-cohort study 2015 | Germany | More recent available |
| 11585974 |  | Macronutrient, vitamin, and mineral intakes in the EPIC-Germany cohorts 2001 | Germany | More recent available |
| 12032654 |  | Vitamins--dietary intake and intake from dietary supplements in Germany 2002 | Germany | More recent available |
| 14972071 |  | Dietary behaviour of German adults differing in levels of sport activity 2004 | Germany | More recent available |
| 15220941 |  | Food and nutrient intake in East and West Germany, 8 years after the reunification--The German Nutrition Survey 1998 2004 | Germany | More recent available |
| 15549199 |  | [Use of vitamin and mineral supplements in Germany] 2004 | Germany | More recent available |
| 16802545 |  | [Vitamins and trace elements in nutrition. Update 2005] 2006 | Germany | More recent available |
| 17416579 | Biró L1, Zajkás G, Greiner E, Szórád I, Varga A, Domonkos A, Agoston H, Balázs A, Mozsáry E, Vitrai J, Hermann D, Boros J, Németh R, Kéki Z, Martos E. | [Hungarian national dietary survey, 2003-2004. Micronutrients: mineral salts] 2007 | Hungary | More recent available |
|  | Biro, G. | Nutrition and cardiovascular risk: the Hungarian experience | Hungary | More recent available |
| 17702688 | Zajkás G1, Bíró L, Greiner E, Szórád I, Agoston H, Balázs A, Vitrai J, Hermann D, Boros J, Németh R, Kéki Z, Martos E. | [Dietary survey in Hungary, 2003-2004. Micronutrients: vitamins] 2007 | Hungary | More recent available |
| 12795823 |  | Impact of ready-to-eat breakfast cereal (RTEBC) consumption on adequacy of micronutrient intakes and compliance with dietary recommendations in Irish adults 2003 | Ireland | More recent available |
| 12821886 |  | Social diversity of Irish adults nutritional intake 2003 | Ireland | More recent available |
| 18631413 |  | Analysis of the impact of fortified food consumption on overall dietary quality in Irish adults 2009 | Ireland | More recent available |
| 20351471 | Okuda | Integration of Data from NIPPON DATA80/90 and National Nutrition Survey in Japan: For Cohort Studies of Representative Japanese on Nutrition | Japan | More recent available |
| 16951538 |  | Impact of non-dietary nutrients intake on misclassification in the estimation of nutrient intake in epidemiologic study 2006 | Japan | More recent available |
| 17571946 |  | Dietary habits and risk of ovarian cancer death in a large-scale cohort study (JACC study) in Japan 2007 | Japan | More recent available |
| 20351473 |  | Dietary salt intake and blood pressure in a representative Japanese population: baseline analyses of NIPPON DATA80 2010 | Japan | More recent available |
| 18460439 | Tee, E.-S. and Florentino, R.F. (eds) | Recommended Dietary Allowances: Harmonization in Southeast Asia. | Malaysia | More recent available |
|  | Morales Torres, Jorge, MartÃ­nez Lemus, MÃ³nica | Consumo de calcio en mujeres de nivel socioeconomico bajo en Leon, Guanajuato | Mexico | More recent available |
| 22081687 | Vissers PA1, Streppel MT, Feskens EJ, de Groot LC | The contribution of dairy products to micronutrient intake in the Netherlands 2011 | Netherlands | More recent available |
| 12548307 |  | Socio-economic status, dietary intake and 10 y trends: the Dutch National Food Consumption Survey 2003 | Netherlands | More recent available |
| 20042437 |  | Dairy intake and the risk of bladder cancer in the Netherlands Cohort Study on Diet and Cancer 2010 | Netherlands | More recent available |
| 22818824 |  | The Dutch Healthy Diet index (DHD-index): an instrument to measure adherence to the Dutch Guidelines for a Healthy Diet 2012 | Netherlands | More recent available |
| 8923620 | Bisgrove, E. Z. and Popkin, B. M. | Does women's work improve their nutrition: evidence from the urban Philippines | Philipines | More recent available |
| 15975190 | Sekula, W. and Nelson, M. and Figurska, K. and Oltarzewski, M. and Weisell, R. and Szponar, L. | Comparison between household budget survey and 24-hour recall data in a nationally representative sample of Polish households | Poland | More recent available |
| 14531085 |  | [Nutrition quality of daily food intake of the Warsaw population in the years 1993-2001. Warsaw Pol-MONICA bis project] 2003 | Poland | More recent available |
| 23357977 |  | The association between daily calcium intake and sarcopenia in older, non-obese Korean adults: the fourth Korea National Health and Nutrition Examination Survey (KNHANES IV) 2009 2013 | South Korea | More recent available |
| 24915202 |  | Intakes of dairy products and calcium and obesity in Korean adults: Korean National Health and Nutrition Examination Surveys (KNHANES) 2007-2009 2014 | South Korea | More recent available |
| 20093197463 |  | The impact of rapid economic growth and globalization on zinc nutrition in South Korea 2009 | South Korea | More recent available |
| 11370469 |  | [Food consumption and food sources of energy and nutrients in Canary Islands (1997-98)] 2000 | Spain | More recent available |
| 11918471 |  | Vitamins in Spanish food patterns: the eVe Study 2001 | Spain | More recent available |
| 15033092 |  | [Prediction of the total calcium intake from consumption of milk products in Spain adult population. INDICAD Study 2001] 2004 | Spain | More recent available |
| 15877877 |  | The Diet Quality Index-International (DQI-I): is it a useful tool to evaluate the quality of the Mediterranean diet? 2005 | Spain | More recent available |
| 11002379 |  | Smoking, dietary calcium and vitamin D deficiency in women: a population-based study 2000 | Switzerland | More recent available |
| 23425344 |  | Trends in dietary intake in Switzerland, 1999 to 2009 2014 | Switzerland | More recent available |
| 16169831 |  | Intake levels and major food sources of energy and nutrients in the Taiwanese elderly 2005 | Taiwan | More recent available |
| 11753482 |  | Geographical variations in nutrition-related vascular risk factors in the UK: National Diet and Nutrition Survey of People Aged 65 Years and Over 2001 | UK | More recent available |
| 21380638 |  | A study of relationships between bone-related vitamins and minerals, related risk markers, and subsequent mortality in older British people: the National Diet and Nutrition Survey of People Aged 65 Years and Over 2012 | UK | More recent available |
| 8227877 | Looker, A. C. and Loria, C. M. and Carroll, M. D. and McDowell, M. A. and Johnson, C. L. | Calcium intakes of Mexican Americans, Cubans, Puerto Ricans, non-Hispanic whites, and non-Hispanic blacks in the United States | US | More recent available |
| 17081829 |  | Ready-to-eat breakfast cereal consumption enhances milk and calcium intake in the US population 2006 | US | More recent available |
| 19571165 |  | The role of dairy in meeting the recommendations for shortfall nutrients in the American diet 2009 | US | More recent available |
| 20702750 |  | Americans do not meet federal dietary recommendations 2010 | US | More recent available |
| 21865568 |  | Foods, fortificants, and supplements: Where do Americans get their nutrients? 2011 | US | More recent available |
| 24507693 |  | Consumptions of plain water, moisture in foods and beverages, and total water in relation to dietary micronutrient intakes and serum nutrient profiles among US adults 2015 | US | More recent available |
| 25458992 |  | Nutrient intake, diet quality, and weight/adiposity parameters in breakfast patterns compared with no breakfast in adults: National Health and Nutrition Examination Survey 2001-2008 2014 | US | More recent available |
|  | . | Ecuador. Ministerio de Salud, PÃºblica, OrganizaciÃ³n Panamericana de la, Salud |  | More recent available |
| 25822905 | Borg | Micronutrient intakes and potential inadequacies of community-dwelling older adults: a systematic review 2015 | "western countries" | No calcium data |
| 17718007 | Johnecheck, W. A. and Holland, D. E. | Nutritional status in postconflict Afghanistan: evidence from the National Surveillance System Pilot and National Risk and Vulnerability Assessment | Afghanistan | No calcium data |
| 45160768 | Drorbaugh, Natalie and Neumann, C. G. | MICRONUTRIENT DEFICIENCIES IN FOOD AID BENEFICIARIES: A REVIEW OF SEVEN AFRICAN COUNTRIES | Africa | No calcium data |
| 26448405 | Schaafsma, Torin and Wakefield, Jon and Hanisch, Rachel and Bray, Freddie and SchÃ¼z, Joachim and Joy, Edward J. M. and Watts, Michael J. and McCormack, Valerie | Africa's Oesophageal Cancer Corridor: Geographic Variations in Incidence Correlate with Certain Micronutrient Deficiencies | Africa | No calcium data |
| 20043102569. Publica | van Heerden, S. M. van and SchÃ¶nfeldt, H. C. | The need for food composition tables for southern Africa | Africa | No calcium data |
| 18753375 | Brownie, Sonya and Rolfe, Margaret | Supplement utilisation patterns of older Australians: Results from a randomly selected national sample | Australia | No calcium data |
| 22672029 |  | Most Australians do not meet recommendations for dairy consumption: findings of a new technique to analyse nutrition surveys 2012 | Australia | No calcium data |
| 20063059859 |  | Supplement utilisation patterns of older Australians: results from a randomly selected national sample 2005 | Australia | No calcium data |
| 25971955 | Zykova | Cross-sectional analysis of nutrition and serum uric acid in two Caucasian cohorts: the AusDiab Study and the Tromso study 2015 | Australia, Norway | No calcium data |
| 23193772 | Bermudez OI, Lividini K, Smitz MF, and Fiedler JL | Estimating micronutrient intakes from Household Consumption and Expenditures Surveys (HCES): an example from Bangladesh 2012 | Bangladesh | No calcium data |
| 27307152 | Bromage S, Ahmed T, Fawzi WW | Calcium Deficiency in Bangladesh: Burden and Proposed Solutions for the First 1000 Days | Bangladesh | No calcium data |
| 18426635 |  | The gap between food-based dietary guidelines and usual food consumption in Belgium, 2004 2009 | Belgium | No calcium data |
| 17851458 |  | Dietary patterns of urban adults in Benin: relationship with overall diet quality and socio-demographic characteristics 2009 | Benin | No calcium data |
| 15661482 |  | Predictors of food variety and dietary diversity among older persons in Botswana 2005 | Botswana | No calcium data |
| 25047421 | Nogueira Bezerra, Ilana and Goldman, Joseph and Rhodes, Donna G. and Hoy, Mary Katherine and de Moura Souza, Amanda and Chester, Deirdra N. and Martin, Carrie L. and Sebastian, Rhonda S. and Ahuja, Jaspreet K. and Sichieri, Rosely and Moshfegh, Alanna J. | Difference in adult food group intake by sex and age groups comparing Brazil and United States nationwide surveys | Brazil | No calcium data |
| 21513578 |  | Antioxidant intake among Brazilian adults--the Brazilian Osteoporosis Study (BRAZOS): a cross-sectional study 2011 | Brazil | No calcium data |
| 20143058709 |  | Intakes of antioxidant vitamins and minerals in the Brazilian diet 2013 | Brazil | No calcium data |
| 27187456 | Smith, Geoffry and Wimalawansa, Sunil J. and Laillou, Arnaud and Sophonneary, Prak and Un, Samoeurn and Hong, Rathavuth and Poirot, Etienne and Kuong, Khov and Chamnan, Chhoun and De Los Reyes, Francisco N. and Wieringa, Frank T. | High Prevalence of Vitamin D Deficiency in Cambodian Women: A Common Deficiency in a Sunny Country | Cambodia | No calcium data |
| 27338454 | Wieringa, F. T. and Dahl, M. and Chamnan, C. and Poirot, E. and Kuong, K. and Sophonneary, P. and Sinuon, M. and Greuffeille, V. and Hong, R. and Berger, J. and Dijkhuizen, M. A. and Laillou, A. | The high prevalence of anemia in Cambodian children and women cannot be satisfactorily explained by nutritional deficiencies or hemoglobin disorders | Cambodia | No calcium data |
| 27043624 | Wieringa, F. T. and Sophonneary, P. and Whitney, S. and Mao, B. and Berger, J. and Conkle, J. and Dijkhuizen, M. A. and Laillou, A. | Low prevalence of iron and vitamin A deficiency among Cambodian women of reproductive age | Cambodia | No calcium data |
| 24684161 |  | Dietary exposure and health risk assessment for 14 toxic and essential trace elements in Yaounde: the Cameroonian total diet study 2014 | Cameroon | No calcium data |
| 26121703 |  | Comparison of a Household Consumption and Expenditures Survey with Nationally Representative Food Frequency Questionnaire and 24-hour Dietary Recall Data for Assessing Consumption of Fortifiable Foods by Women and Young Children in Cameroon 2015 | Cameroon | No calcium data |
| 26446486 |  | Regional, Socioeconomic, and Dietary Risk Factors for Vitamin B-12 Deficiency Differ from Those for Folate Deficiency in Cameroonian Women and Children 2015 | Cameroon | No calcium data |
| 17212847 | Csizmadi | Adaptation and evaluation of the National Cancer Institute's Diet History Questionnaire and nutrient database for Canadian populations 2007 | Canada | No calcium data |
| 23703722 | Langsetmo L, Berger C, Kreiger N, Kovacs CS, Hanley DA, Jamal SA, Whiting SJ, Genest J, Morin SN, Hodsman A, Prior JC, Lentle B, Patel MS, Brown JP, Anastasiades T, Towheed T, Josse RG, Papaioannou A, Adachi JD, Leslie WD, Davison KS, Goltzman D; CaMos Group. | Calcium and vitamin D intake and mortality: results from the Canadian Multicentre Osteoporosis Study (CaMos) 2013 | Canada | No calcium data |
| 20383227 | Tarasuk V1, Fitzpatrick S, Ward H. | Nutrition inequities in Canada 2010 | Canada | No calcium data |
| 19370049 | Vatanparast H1, Dolega-Cieszkowski JH, Whiting SJ. | Many adult Canadians are not meeting current calcium recommendations from food and supplement intake 2009 | Canada | No calcium data |
| 21269008 |  | Socio-economic status and vitamin/ mineral supplement use in Canada 2010 | Canada | No calcium data |
| 12490653 | Serra-Majem, L. and MacLean, D. and Ribas, L. and BrulÃ©, D. and Sekula, W. and Prattala, R. and Garcia-Closas, R. and Yngve, A. and Lalonde, M. and Petrasovits, A. | Comparative analysis of nutrition data from national, household, and individual levels: results from a WHO-CINDI collaborative project in Canada, Finland, Poland, and Spain | Canada, Finland, Poland, and Spain | No calcium data |
| 15727192 | Yutao | [Evaluating dietary quality of type 2 diabetics in Macao by Healthy Eating Index] 2004 | China | No calcium data |
|  | Zhai F, Wang H | The double burden of malnutrition in China. In The double burden of malnutrition: Case studies from six developing countries. FAO Food and Nutrition Paper 84 | China | No calcium data |
| 23157861 |  | [Survey of dietary intake of Chinese adults in 2010] 2012 | China | No calcium data |
| 18947030 | Wang | Worldwide trends in dairy production and consumption and calcium intake: is promoting consumption of dairy products a sustainable solution for inadequate calcium intake? 2008 | China, India, Russia, US | No calcium data |
| 20890556 | Herran, O. F. and Ardila, M. F. and Rojas, M. P. and HernÃ¡ndez, G. A. | Design of dietary questionnaires to study the relationships between diet and cancer prevalence in Colombia. / DiseÃ±o de cuestionarios de frecuencia de consumo para estudiar la relaciÃ³n dieta-cÃ¡ncer en Colombia | Columbia | No calcium data |
| 20083247890. Publica | Manjarrés Correa, L. M. | Reliable data collected method about food intake in population studies. / MÃ©todos para precisar la recolecciÃ³n de la ingesta dietÃ©tica en estudios poblacionales | Columbia | No calcium data |
| 20133159009. Publica | RodrÃ­guez, S. and Cunningham, L. | Micronutrient deficiencies in older adults in Costa Rica, National Nutrition Survey, 2008-2009. / Deficiencias de micronutrientes en los adultos mayores en Costa Rica Encuesta nacional de nutriciÃ³n, 2008-2009 | Costa Rica | No calcium data |
| 20843485 | Gonzalez | Diet and cancer prevention: Contributions from the European Prospective Investigation into Cancer and Nutrition (EPIC) study 2010 | Denmark (3918), France (4639), Germany (4418), Greece (2686), Italy (3956), Netherlands (3984), Norway (1798), Spain (3220), Sweden (6050), UK (1286) | No calcium data |
| 12639231 | Hjartaker | Consumption of dairy products in the European Prospective Investigation into Cancer and Nutrition (EPIC) cohort: data from 35 955 24-hour dietary recalls in 10 European countries 2002 | Denmark (3918), France (4639), Germany (4418), Greece (2686), Italy (3956), Netherlands (3984), Norway (1798), Spain (3220), Sweden (6050), UK (1286) | No calcium data |
| 19888278 | Kroger | Specific food group combinations explaining the variation in intakes of nutrients and other important food components in the European Prospective Investigation into Cancer and Nutrition: an application of the reduced rank regression method 2009 | Denmark (3918), France (4639), Germany (4418), Greece (2686), Italy (3956), Netherlands (3984), Norway (1798), Spain (3220), Sweden (6050), UK (1286) | No calcium data |
| 48277110 | Andersen, Niels Lyhne and Tetens, Inge | How to reach a common estimate of high dietary micronutrient intakes for safe addition of vitamins and minerals to foods? | Denmark, Finland, Germany, Ireland, Italy, Poland, Spain, The Netherlands, and United Kingdom. | No calcium data |
| 25411306 | Freire, Wilma B. and Silva-Jaramillo, Katherine M. and RamÃ­rez-Luzuriaga, MarÃ­a J. and Belmont, Philippe and Waters, William F. | The double burden of undernutrition and excess body weight in Ecuador | Ecuador | No calcium data |
| 17375116 |  | The overlap of overweight and anaemia among women in three countries undergoing the nutrition transition 2008 | Egypt | No calcium data |
| 24699195 | Likolic | Identifying critical nutrient intake in groups at risk of poverty in Europe: the CHANCE project approach 2014 | Europe | No calcium data |
| 20100367 | Serra-Majem | Dietary assessment methods for intakes of iron, calcium, selenium, zinc and iodine 2009 | Europe | No calcium data |
| 26807571 | Smith | Global Expanded Nutrient Supply (GENuS) Model: A New Method for Estimating the Global Dietary Supply of Nutrients 2016 | EVERY COUNTRY | No calcium data |
|  | Woodson, K. and Albanes, D. and Tangrea, J. A. and Rautalahti, M. and Virtamo, J. and Taylor, P. R. | Association between alcohol and lung cancer in the alpha-tocopherol, beta-carotene cancer prevention study in Finland | Finland | No calcium data |
| 22081686 | Coudray B | The contribution of dairy products to micronutrient intakes in France 2011 | France | No calcium data |
| 19402948 |  | Nutritional status and dietary adequacy in rural communities of a protected area in Gabon 2009 | Gabon | No calcium data |
| 20103346337 | Gröber, U. | Metabolic tuning of micronutrients: the basis of prevention 2009 | Germany | No calcium data |
| 25866161 | Heuer T1, Krems C1, Moon K1, Brombach C2, Hoffmann I | Food consumption of adults in Germany: results of the German National Nutrition Survey II based on diet history interviews | Germany | No calcium data |
| 20153093342 | Simpson F, Lührmann P, Gmünd S | Nutritional status of adults from poor households: An analysis of data from the National Nutrition Survey II with consideration of education and nutrition knowledge 2015 | Germany | No calcium data |
| 18364333 | Pobocik RS1, Trager A, Monson LM | Dietary patterns and food choices of a population sample of adults on Guam 2008 | Guam (US) | No calcium data |
| 22695968 |  | Food prices and poverty negatively affect micronutrient intakes in Guatemala 2012 | Guatemala | No calcium data |
| 20083040027 | Arlappa N, Balakrishna N, Laxmaiah A, Brahmam GNV | Pattern of indigenous vegetables and legumes consumption in rural India 2007 | India | No calcium data |
| 20083040027. Publica | Arlappa, N. and Balakrishna, N. and Laxmaiah, A. and Brahmam, G. N. V. | Pattern of indigenous vegetables and legumes consumption in rural India | India | No calcium data |
| 49251782 | Mallikharjuna Rao, K. and Balakrishna, N. and Arlappa, N. and Laxmaiah, A. and Brahmam, G. N. V. | Diet and Nutritional Status of Women in India | India | No calcium data |
|  | Rao, N. P. and Ramnath, T. and Sastry, J. G. | Diet and nutrition in urban areas | India | No calcium data |
| 18497435 | Teotia, S. P. S. and Teotia, M. | Nutritional bone disease in Indian population | India | No calcium data |
| 21560461 |  | Secular trends in height in different states of India in relation to socioeconomic characteristics and dietary intakes 2011 | India | No calcium data |
| 11114675 |  | The potential of various foods to serve as a carrier for micronutrient fortification, data from remote areas in Indonesia 2000 | Indonesia | No calcium data |
| 25761500 | Black LJ1, Walton J2, Flynn A2, Cashman KD3, Kiely M | Small Increments in Vitamin D Intake by Irish Adults over a Decade Show That Strategic Initiatives to Fortify the Food Supply Are Needed 2015 | Ireland | No calcium data |
| 24712924 |  | Descriptive epidemiological study of food intake among Japanese adults: analyses by age, time and birth cohort model 2014 | Japan | No calcium data |
| 20013096385 |  | Nutrition trends in Japan 2001 | Japan | No calcium data |
| 24986824 | Serdula | Micronutrient status in Jordan: 2002 and 2010 2014 | Jordan | No calcium data |
| 22335442 | Cheserek MJ | Nutritional vulnerability of older persons living in urban areas of Lake Victoria Basin in East Africa: a cross sectional survey 2012 | Kenya, Uganda, and Tanzania | No calcium data |
| 20133245605 | Shin | Associations between dietary patterns and hypertension among Korean adults: the Korean National Health and Nutrition Examination Survey (2008-2010) 2013 | Korea | No calcium data |
| 26125199 | de RomaÃ±a, D. L. and Olivares, M. and Brito, A. | Special Issue: Prevalence of micronutrient deficiencies in Latin America and the Caribbean | Latin America | No calcium data |
| 15456975 |  | Health inequalities in Lithuania: education and nutrition habits 2004 | Lithuania | No calcium data |
| 22436087 |  | Time trends in social differences in nutrition habits of a Lithuanian population: 1994-2010 2012 | Lithuania | No calcium data |
| 22313864 |  | Population compliance with national dietary recommendations and its determinants: findings from the ORISCAV-LUX study 2012 | Luxembourg | No calcium data |
| 17353579 | Mejía-Rodríguez | Use of nutritional supplements among Mexican women and the estimated impact on dietary intakes below the EAR and above the UL 2007 | Mexico | No calcium data |
| 23123493 | Uush, Tserendolgor | Prevalence of classic signs and symptoms of rickets and vitamin D deficiency in Mongolian children and women | Mongolia | No calcium data |
| 14506480 | Rose, D. and Tschirley, D. | Predicting dietary intakes with simple food recall information: a case study from rural Mozambique | Mozambique | No calcium data |
| 18936332 | Iqbal | Dietary patterns and the risk of acute myocardial infarction in 52 countries: results of the INTERHEART study 2008 | Multi | No calcium data |
| 12737018 | Gorstein, Jonathan and Shreshtra, Ram K. and Pandey, Sharada and Adhikari, Ramesh K. and Pradhan, Anjushree | Current status of vitamin A deficiency and the National Vitamin A Control Program in Nepal: results of the 1998 National Micronutrient Status Survey | Nepal | No calcium data |
| 26097700 | Sluik | Evaluation of a nutrient-rich food index score in the Netherlands 2015 | Netherlands | No calcium data |
| 16859179 | Adewusi | Traditional and Acacia colei seed-incorporated diets in Maradi, Niger Republic 2006 | Niger | No calcium data |
| 20093192506 | Drorbaugh | Micronutrient deficiencies in food aid beneficiaries: a review of seven African countries 2009 | Niger, Ethiopia, Kenya, Uganda, Rwanda, Zambia, and Zimbabwe | No calcium data |
| 8414269 | Igbedioh, S. O. | Undernutrition in Nigeria: dimension, causes and remedies for alleviation in a changing socio-economic environment [Language: en] | Nigeria | No calcium data |
|  |  | Democratic People’s Republic of Korea Final Report of the National Nutrition Survey 2012 | North Korea | No calcium data |
| 15050358 | Akhter, P., Baloch, N.Z., Mohammad, D., Orfi, S.D. and Ahman, N. | Assessment of strontium and calcium levels in Pakistani diet | Pakistan | No calcium data |
| 25171194 |  | Predicted efficacy of the Palestinian wheat flour fortification programme: complementary analysis of biochemical and dietary data 2015 | Palestine | No calcium data |
| 17455402 | Lechtig, A. and Gross, R. and Aquino Vivanco, O. and Gross, U. and LÃ³pez de RomaÃ±a, D. | Lessons learned from the scaling-up of a weekly multimicronutrient supplementation program in the Integrated Food Security Program (PISA) | Peru | No calcium data |
| 24083768 | Rojas D, Carlos and Moreno P, Carmen and Vara A, Enrique and Bernui L, Ivonne and Ysla M, Marlit | CONSUMO DE ENERGÃA Y NUTRIENTES, CARACTERÃSTICAS SOCIOECONÃ“MICAS, POBREZA Y ÃREA DE RESIDENCIA DE MUJERES PERUANAS EN EDAD FÃ‰RTIL | Peru | No calcium data |
| 20390661 | Miura S1, Yagi M, Saavedra OL, Yamamoto S. | Sociodemographic variation in knowledge of osteoporosis and locally available calcium-rich foods among urban women living on low incomes in Davao, Philippines 2010 | Philippines | No calcium data |
|  | Bersales, L. G. S. | Philippines National Demographic and Health Survey 2013 | Phillipines | No calcium data |
| 17711113 | Dybkowska E1, Swiderski F, Waszkiewicz-Robak B. | [Vitamin intake in an average diet of Warsaw adult inhabitants] 2007 | Poland | No calcium data |
| 11924945 | Szponar, L. and Sekula, W. and Nelson, M. and Weisell, R. C. | The Household Food Consumption and Anthropometric Survey in Poland | Poland | No calcium data |
| 16116492 | Marques-Vidal | Milk intake is inversely related to obesity in men and in young women: data from the Portuguese Health Interview Survey 1998-1999 2006 | Portugal | No calcium data |
| 15575953 |  | Educational and economic determinants of food intake in Portuguese adults: a cross-sectional survey 2004 | Portugal | No calcium data |
| 19623199 |  | The association of fruits, vegetables, antioxidant vitamins and fibre intake with high-sensitivity C-reactive protein: sex and body mass index interactions 2009 | Portugal | No calcium data |
| 26371041 |  | Lifestyle Patterns Are Associated with Elevated Blood Pressure among Qatari Women of Reproductive Age: A Cross-Sectional National Study 2015 | Qatar | No calcium data |
| 16265908 | Martinchik AN, Baturin AK, Martinchik EA, Peskova EV, Starovoĭtov ML | [Dietary intake of antioxidant vitamins in Russian population] 2005 | Russia | No calcium data |
| 19354184 | Rabotaev EF, Khokhlova EA | [Topical problems of micronutrients deficiency in the Chuvash Republic] 2009 | Russia | No calcium data |
|  | RÃ©gionaux, R. | SÃ©nÃ©gal: Ongoing Demographic and Health Survey (EDS), 2012-2014. Regional Results. / SÃ©nÃ©gal: enquÃªte dÃ©mographique et de santÃ© continue (EDS-continue) - 2012-2014. RÃ©sultats RÃ©gionaux | Senegal | No calcium data |
| 19961408671. Publica | Langenhoven, M. L. and Wolmarans, P. and Jooste, P. L. and Dhansay, M. A. and BenadÃ©, A. J. S. | Food consumption profile of the South African adult population | South Africa | No calcium data |
| 24564193 | Msaki, Mark M. and Hendriks, Sheryl L. | Measuring household food security using food intake indicators in rural Kwazulu Natal, South Africa | South Africa | No calcium data |
| 13241914 | van Heerden, S. M. and SchÃ¶nfeldt, H. C. | The need for food composition tables for southern Africa | South Africa | No calcium data |
| 19010615 | Perez | Epidemiology of risk factors and symptoms associated with menopause in Spanish women 2009 | Spain | No calcium data |
| 12660405 | Tormo MJ1, Navarro C, Chirlaque MD, Barber X, Argilaga S, Agudo A, Amiano P, Barricarte A, Beguiristain JM, Dorronsoro M, Gonzalez CA, Mart'nez C, Quiros JR, Rodriguez M. | Physical sports activity during leisure time and dietary intake of foods and nutrients in a large Spanish cohort 2003 | Spain | No calcium data |
| 22784794 |  | Food consumption of Sri Lankan adults: an appraisal of serving characteristics 2013 | Sri Lanka | No calcium data |
| 20153079027. Publica | Ahmed, W. A. M. and Ahmed, E. A. and Arafa, K. A. O. and El-Amin, E. I. S. and Alostaz, Z. M. and Khalid, K. E. | Nutritional status of mothers and its determinants in Alemtidad area, Khartoum | Sudan | No calcium data |
| 26490112 | Ax | Dietary patterns in Swedish adults; results from a national dietary survey 2016 | Sweden | No calcium data |
| 26490112 | Ax, E. and Lemming, E. W. and Becker, W. and Andersson, A. and Lindroos, A. K. and Cederholm, T. and SjÃ¶gren, P. and Fung, T. T. | Dietary patterns in Swedish adults; results from a national dietary survey | Sweden | No calcium data |
| 21540318 | Larsson SC1, Virtamo J, Wolk A | Potassium, calcium, and magnesium intakes and risk of stroke in women 2011 | Sweden | No calcium data |
| 26715079 | Lee MS, Wahlqvist ML, Peng CJ | Dairy foods and health in Asians: Taiwanese considerations | Taiwan | No calcium data |
| 14685929 |  | Predictors of community women's osteoporosis prevention intention--a pilot study 2003 | Taiwan | No calcium data |
| 16169839 |  | Bone health status of the elderly in Taiwan by quantitative ultrasound 2005 | Taiwan | No calcium data |
| 22073796 |  | Dietary patterns and nutritional health of women: the nutrition transition in rural Tanzania 2011 | Tanzania | No calcium data |
| 22569485 | Sangthong | Health behaviors among short- and long- term ex-smokers: results from the Thai National Health Examination Survey IV, 2009 2012 | Thailand | No calcium data |
| 17691231 |  | Dietary habits, diversity and the indigenous diet of the Turks and Caicos Islands: implications for island-specific nutrition intervention 2006 | Turks and Caicos | No calcium data |
| 78547684 | O'Connor, A. | An overview of the role of bread in the UK diet | UK | No calcium data |
| 25333716 | Laillou A | Intra-individual double burden of overweight and micronutrient deficiencies among Vietnamese women 2014 | Vietnam | No calcium data |
| 24586831 |  | Micronutrient intakes among women of reproductive age in Vietnam 2014 | Vietnam | No calcium data |
| 27994286 | Khatibzadeh, Shahab and Kashaf, Michael Saheb and Micha, Renata and Fahimi, Saman and Peilin, Shi and Elmadfa, Ibrahim and Kalantarian, Shadi and Wirojratana, Pattra and Ezzati, Majid and Powlese, John and Mozaffarian, Dariush | A global database of food and nutrient consumption | worldwide | No calcium data |
| 24605697 | Fiedler | Identifying zambia's industrial fortification options: toward overcoming the food and nutrition information gap-induced impasse 2013 | Zambia | No calcium data |
|  | Wenlock, R. W. | Food intakes and nutritional status - implications for the formulation of development policies for Zambia | Zambia | No calcium data |
| 9466297 | Allain, T. J. and Wilson, A. O. and Gomo, Z. A. and Adamchak, D. J. and Matenga, J. A. | Diet and nutritional status in elderly Zimbabweans | Zimbabwe | No calcium data |
| 20093069816. Publica | Gadaga, T. H. and Madzima, R. and Nembaware, N. | Status of micronutrient nutrition in Zimbabwe: a review | Zimbabwe | No calcium data |
|  | . | Costa Rica. Ministerio de, Salud |  | No calcium data |
| 11411277 |  |  |  | No calcium data |
|  |  | Sistema integrado de vigilancia de intervenciones nutricionales (SIVIN) |  | No calcium data |
|  | Waib, Paulo H., Burini, Roberto C. | AplicaÃ§Ã¤o dos mÃ©todos de inquÃ©rito alimentar na avaliaÃ§Ã¤o da ingestÃ¤o de cÃ¡lcio em estudos epidemiolÃ³gicos | Brazil | Not available |
| 20113333926 | Fan | Study on usual nutrients intake among adult residents in China 2011 | China | Not available |
| 18095576 | He | [Status of dietary calcium intake of Chinese residents] 2007 | China | Not available |
| 23183501 | Adámkova V | The quality of the nutrition in smokers 2012 | Czech Rep | Not available |
| 22835634 | Lugasi A1, Sarkadi Nagy E, Zentai A, Bakacs M, Illés E, Baldauf Z, Martos E | [Hungarian Diet and Nutritional Status Survey -- the OTAP2009 study. II. Energy and macronutrient intake of the Hungarian population] 2012 | Hungary | Not available |
| 22805039 | Martos | [Hungarian Diet and Nutritional Status Survey - the OTAP2009 study. IV. Macroelement intake of the Hungarian population] 2012 | Hungary | Not available |
| 22759746 | Nagy | [Hungarian Diet and Nutritional Status Survey -- the OTAP2009 study. II. Energy and macronutrient intake of the Hungarian population] 2012 | Hungary | Not available |
| 21913535 | Osho | Physical activity level, nutritional intake, functional status and quality of life of geriatric individuals in Lagos, South-West, Nigeria: a cross sectional survey 2011 | Nigeria | Not available |
| 18181459 | Yoshimoto Y1, Muto S, Fujikura J, Sakuma M, Kaneko Y, Otto CT, Nakamura L | Obesity, bone status and dietary intake of Palauan elderly congregating in a Senior Citizen's Center 2005 | Palau | Not available |
|  | Waśkiewicz | Influence of socioeconomic status on vitamins and minerals intake in diet of adults Polish population - national health survey in Poland - project WOBASZ. / Wpyw statusu spoeczno-ekonomicznego na zawartoÅ›cÂ´ wybranych witamin i skadnikÃ³w mineralnych w diecie dorosych mieszkanÂ´cÃ³w Polski - wielooÅ›rodkowe ogÃ³lnopolskie badanie stanu zdrowia ludnoÅ›ci (WOBASZ) | Poland | Not available |
| 20073124412 |  | Influence of socioeconomic status on vitamins and minerals intake in diet of adults Polish population - national health survey in Poland - project WOBASZ 2006 | Poland | Not available |
| 21510049 | Koval'chuk VK, Ivanova IL | [The specific features of calcium, magnesium, and phosphorus supply to the population in the Primorskii territory] 2011 | Russia | Not available |
| 24553027 | Ayo-Yusuf | Epidemiological association between osteoporosis and combined smoking and use of snuff among South African women 2014 | South Africa | Not available |
|  | . | Guatemala. Ministerio de Salud PÃºblica y Asistencia, Social |  | Not available |
|  | Gueri, Miguel | SituaciÃ³n y magnitud de la deficiencia de micronutrientes en AmÃ©rica Latina y el Caribe |  | Not available |
|  |  | Encuesta nacional de micronutrientes (ENM 2000): informe completo |  | Not available |
