# Supplementary material for: Global dietary calcium intake among adults: a systematic review
Source: Springer Nature journal article supplement (doi:10.1007/s00198-017-4230-x), 2017-10-12
Supplement: MOESM3 [file 15129244]

**Appendix C. Average dietary calcium intake by country and study characteristics, with references**

| **Calcium Intake, mg/d** | **Country** | **Survey Years** | **Ages, y** | **Female, %** | **BMI, kg/m2** | **Calcium Intake Assessment** | **N Total** | **Representative****a** | **Female: Male Ratio** | **Age Analyses**b | **SES Analysesb** |
| --- | --- | --- | --- | --- | --- | --- | --- | --- | --- | --- | --- |
| 175 | Nepal [1] | 2003 | ≥20 | 62 | 19.4 | FFQ & food record | 317 | No (local, small) | 0.85 |  |  |
| 238 | Uganda [2] | nd (pre-2011) | ndc |  |  | Recall | 173 households | No (local, children, small) |  |  |  |
| 297 | Colombia [3] | 2003 | 20-60 |  |  | Food record | 70 | No (local, age, small) |  |  |  |
| 313 | Thailand [4] | nd (pre-2008) | 20-85 |  | 22.4 | Recall | 436 | No (local, small) | 0.70 |  |  |
| 335 | Gambia [5] | 2011-2013 | ≥40 | 52 |  | Food record | 467 | No (age, small) | 0.78 | Similard |  |
| 338 | China [6] | 2002 | 2-101c |  |  | Recall | 68962 | No (children) |  |  | Rural (vs. urban) lower |
| 342 | Indonesia [7] | 1998 | nd |  |  | nd | nd | No (old) |  |  |  |
| 345 | Vietnam [8] | 2000 | nd |  |  | FFQ | 4080 | No (local) |  |  |  |
| 358 | Burkina Faso [9] | 2006 | nd |  |  | Recall | 1005 households | No (local) |  |  |  |
| 384e | Ecuador [10] | 2012 | 19-60 |  |  | Recall | 10592 | No (age) | 0.96 |  |  |
| 393 | Cape Verde [11] | 2002 | Allc |  |  | Food record | 4824 households | No (children) |  |  |  |
| 399 | Malaysia [12] | 2002-2003 | 18-59 | 52 |  | Recall | 6886 | No (age) | 0.99 | Similard | Rural (vs. urban) lower |
| 427 | Argentina [13] | 2004-2005 | 18-49 | 100 |  | nd | 4819 | No (age, women) |  |  |  |
| 429 | India [14] | 2011-2012 | ≥18 | 50 |  | Recall | 306329 | Yes | 0.83 |  |  |
| 440 | Philippines [15] | 2003 | Allc |  |  | Food record | 25882 | No (children) |  |  |  |
| 444 | Mali [16] | 2007 | 15-49 | 100 |  | Recall | 108 | No (local, women, small) |  |  |  |
| 458 | Bolivia [17] | 2002 | nd |  |  | FFQ | 5746 households | Yes |  |  |  |
| 462 | Pakistan [18] | 2008 | ≥18 | 100 | 23.8 | Recall | 200 | No (local, women, small) |  |  |  |
| 471 | Tanzania [19] | 1987 | 35-74 |  |  | Recall | 173 | No (local, age, small, old) | Urban 0.91, rural 1.13 | Older lower | Rural (vs. urban) higher |
| 479 | South Africa [20] | 1983-2000 | ≥15 |  |  | Recall | 3231 | No (old) | 0.65 |  |  |
| 483 | South Korea [21] | 2010-2012 | ≥19 | 50 |  | Recall | 15603 | Yes |  |  | Food insufficient lower |
| 487 | Barbados [22] | 2000 | ≥18 |  | 25.8 | FFQ & recall | 1739 | Yes | 0.89f | Older higher |  |
| 488 | Norway [23, 24] | 1994-1995 | 24-70 |  | 25.6 | FFQ | 18914 | No (age, old) | 0.81 |  |  |
| 489 | Guam [25] | nd (early 2000s) | 18-83 |  |  | Recall | 400 | No (small) | 0.87 |  |  |
| 492 | Israel [26] | 1999-2001 | 25-64 |  |  | Recall | 2782 | No (age, old) |  |  |  |
| 495 | Egypt [16] | 2004 | 20-60 | 100g |  | Recall | 1090 | No (age, women) |  |  |  |
| 498 | Myanmar [7] | 1998 | nd |  |  | nd | nd | No (old) |  |  |  |
| 505 | Brazilh  [27, 28] | 2009 | 20-59/≥60 |  | 25.5/nd | Food record | 21003/4322 | No (age) | 0.89/0.95 |  | Income groups similar |
| 507 | Palestine [29] | nd (pre-2012) | 31-50 | 100 |  | Recall | 149 | No (local, age, women, small) |  |  |  |
| 529 | Bangladesh [30] | 2011 | Allc | 51 |  | Unclear | 31066 | No (children) | 0.96 |  | Rural (vs. urban) lower |
| 533 | Japan [31] | 2003-2007 | 18-74 |  |  | Food record | 22712 | No (age) | 0.99 |  |  |
| 587 | Taiwan [32] | 2005-2008 | 19-64 |  |  | Recall | 1942 | No (age) | 0.92 |  |  |
| 588 | Botswana [33] | 2007 | 18-75 | 80 | 26.2 | Recall | 79 | No (local, age, small) |  |  |  |
| 607 | Tonga [34] | 2005-2006 | 40-59 |  | 32.2 | Recall | 34 | No (local, age, small) | 0.76 |  |  |
| 616 | Algeria [35] | 2009-2010 | 41-66 (71% of sample) |  | 27.1 | Recall | 176 | No (local, age, small) | 1.18 |  |  |
| 636 | Nigeria [36] | 2003-2004 | ndc |  |  | FFQ | 13142 households | No (children) |  |  | Rural (vs. urban) lower |
| 664 | Ethiopia [37] | 2005 | ≥18 |  | 22.8 | Recall | 356 | No (local, small) | 0.75 |  |  |
| 672 | Morocco [38] | 2004 | ≥16 | 61 |  | FFQ | 691 | No (local, small) |  | Older lower |  |
| 673 | Hungary [39] | 2009 | ≥19 |  |  | FFQ | 3077 | Yes | 0.93 | Older lower |  |
| 673 | Costa Rica [40] | 1996-1998 | 20-65 | 50 |  | Recall | 60 | No (age, small, old) |  |  |  |
| 695 | Kuwait [41] | 2008-2009 | ≥19 | 55.3 |  | Recall | 1049 | Yes | 0.79 | Similard |  |
| 702 | Chileh  [42, 43] | 2014/2012 | ≥65/35-70 | 61/nd | 27.4/29.1 | FFQ | 597/66 | No (local, age, small) |  |  |  |
| 728 | Belgium [44] | 2004 | ≥19 |  |  | Recall | nd | Yes | 0.88 | Older lower |  |
| 760 | Cameroon [45] | 2001 | nd |  |  | nd | 557 households | No (local, small) |  |  |  |
| 765 | Italy [46] | 2005-2006 | ≥18 |  | 25.4 | Recall | 2831 | Yes | 0.91 | Older higher |  |
| 773 | Austria [47] | nd (pre-2004) | ≥55 |  |  | nd | 641 | No (age, small) | 1.06 |  |  |
| 782 | Czech Republic [48] | 2005 | 45-69 |  | 27.8 | FFQ | 7913 | No (local, age) | 1.16 |  |  |
| 787 | Canada [49] | 2004 | ≥19 |  |  | Recall | 35107 | Yes | 0.86 | Older lower |  |
| 788 | Russia [48] | 2005 | 45-69 |  | 26.5 | FFQ | 9098 | No (local, age) | 0.95 |  |  |
| 789 | Spain [44] | 2002-2003 | ≥19 |  |  | Recall | 1923 | Yes | 0.94 | Older lower |  |
| 794 | Singapore [50] | 2010 | 18-69 | 50 |  | FFQ | 1647 | No (age) | 0.94 | Older lower |  |
| 805 | Australia [51] | 2011-2012 | ≥19 | 53 |  | Recall | 9338 | Yes | 0.86 | Older lower |  |
| 805 | Mexico [52] | 2006 | 20-59 | 60 |  | FFQ | 15746 | No (age) | 0.9 |  | Urban vs. rural similar |
| 807 | New Zealand [53] | 2009 | ≥19 |  | 27.6 | Recall | 4721 | Yes | 0.83f | Older lower |  |
| 830 | Polandh  [48, 54] | 2002-2005/2010-2011 | 45-69/45-64 |  | 27.1/29.1 | FFQ | 9859/3862 | No (local, age) | 1.03/1.07 |  | Rural (vs. urban) lower |
| 837 | Jamaica [55] | nd (pre-2000) | 25-74 | 60 | 26.7 | Recall | 73 | No (local, age, small, old) |  |  |  |
| 838 | Serbia [56] | 1998 and 2003 | 30-74 |  |  | Food record | 1305 | No (age) | younger 0.77, older 0.92 | Older lower |  |
| 856 | Jordan [57] | 2012 | ≥18 | 51 |  | Recall | 55 | No (small) |  |  |  |
| 859 | Iran [58] | 2001 | ≥40 |  |  | Recall | 1922 | No (local, age) | 0.91 | Older lower |  |
| 865 | Latvia [59] | 1997 | 19-64 |  |  | Recall | 32 | No (age, small, old) |  |  |  |
| 877 | France [60] | 2005-2007 | 18-79 |  |  | Food record | 1082 | Yes |  | Middle-age higher |  |
| 923 | Portugal [44] | 1999-2003 | ≥19 |  |  | FFQ | 2974 | Yes | 1.09 | Older lower |  |
| 934 | United States [61] | 2001-2010 | ≥19 |  | 28.4 | Recall | 22823 | Yes |  |  |  |
| 942 | Greece [23] | 1992-2001 | 33–72 (95% of sample) | 59 |  | Recall | 1982 | No (age, old) |  |  |  |
| 958 | Denmark [62] | 2000-2004 | 18-75 |  |  | Food record | 4479 | Yes | 0.94 | Older lower |  |
| 965 | Croatia [63] | nd (early 2000s) | 18-55 | 71 | 23.3 | FFQ | 161 | No (local, age, small) | 0.82 |  |  |
| 992 | Swedenh  [64, 65] | 1997 | 49-83/45-79 | 100/0 | 24.7/25.7 | FFQ | 61433/48850 | No (age, old) | 0.85 |  |  |
| 994 | United Kingdom [23] | 1992-2004 | 25-72 (95% of sample) | 70 |  | Recall | 5885 | No (age) |  |  |  |
| 1067 | Switzerland [66] | 2006-2012 | 35-74 | 50 | 25.1 | FFQ | 4307 | No (local, age) | 0.90 |  |  |
| 1068 | Germany [44] | 2005-2007 | ≥19 |  |  | Recall | 13959 | Yes | 0.91 | Older lower |  |
| 1080 | Ireland [67] | 2010 | 18-90 |  |  | Food record | 1499 | Yes |  |  |  |
| 1097e | Finland [68] | 2002 | 25-64 |  |  | Recall | 2007 | No (age) | 0.89 |  |  |
| 1102 | Netherlands [69] | 2010 | 19-69 |  |  | Recall | 2100 | No (age) |  |  |  |
| 1233e | Iceland [70] | 2003 | 30-85 | 52 |  | FFQ | 944 | No (local, age, small) |  | Older higher |  |

Table is shaded by bands of average dietary calcium intake. Abbreviations: BMI = body mass index, FFQ = food frequency questionnaire, N = sample size, nd = no data (not reported), SES = socioeconomic status,

a Was the study nationally representative and current? Local = survey conducted in specific towns, cities, or regions; age = restricted by age range; children = children included; women = women only; small = sample size <1000; old = surveys conducted before 2000.

b Differences in dietary calcium intake between different subgroups, by age or socioeconomic status; lower and higher refer to average calcium intake in noted subgroup. No assessment of statistical significance is implied.

c Includes children.

d Or no pattern noted.

e Explicitly included dietary supplements; however, most studies did not report whether supplement intake was included.

f Less than 0.80 in younger age groups (18/19 to 29/30 years old).

g Mothers only

h Two complementary studies were included for these countries. Relevant data are reported for each study, separated by a forward slash, with the larger study reported first. Where only a single value is presented, the data were the same for both studies, except for calcium intake (which is an average across studies) and whether the studies are nationally representative (which is assessed across studies).

1. Sudo N, Sekiyama M, Maharjan M, Ohtsuka R (2006) Gender differences in dietary intake among adults of Hindu communities in lowland Nepal: assessment of portion sizes and food consumption frequencies. European journal of clinical nutrition 60:469-477

2. Wamono E, Kaaya A, Wamue G, Manyama A, Mwangi M, Muyonga J (2011) Nutrient-enhancement of Matooke banana for improved nutrient intake of people living with HIV/AIDS in Rakai District, Uganda. African Journal of Food, Agriculture, Nutrition and Development 11:

3. Herrán OF, Quintero DC, Ardila MF (2006) Fuentes y magnitud de la variación en la dieta de adultos de Bucaramanga, Colombia. Revista chilena de nutrición 33:55-64

4. Pongchaiyakul C, Charoenkiatkul S, Kosulwat V, Rojroongwasinkul N, Rajatanavin R (2008) Dietary calcium intake among rural Thais in Northeastern Thailand. Journal of the Medical Association of Thailand = Chotmaihet thangphaet 91:153-158

5. Ward K Gambia. Medical Research Council Lifecourse Epidemiology, University of Southampton, UK. Funded by Nutrition and Bone Health Research Programme, Medical Research Council (MRC) Elsie Widdowson Laboratory (personal communication), Cambridge, UK

6. Ma G, Li Y, Jin Y, Zhai F, Kok FJ, Yang X (2007) Phytate intake and molar ratios of phytate to zinc, iron and calcium in the diets of people in China. European journal of clinical nutrition 61:368-374

7. Ling L (2005) Calcium. In Tee E, Florentino R (eds) Recommended Dietary Allowances: Harmonization in Southeast Asia. International Life Sciences Institute, Singapore

8. Khan NC, Mai le B, Hien VT, Lam NT, Hoa VQ, Phuong TM, Nhung BT, Nakamori M, Shimizu Y, Yamamoto S (2008) Development and validation of food frequency questionnaire to assess calcium intake in postmenopausal Vietnamese women. Journal of nutritional science and vitaminology 54:124-129

9. Becquey E, Martin-Prevel Y, Traissac P, Dembele B, Bambara A, Delpeuch F (2010) The household food insecurity access scale and an index-member dietary diversity score contribute valid and complementary information on household food insecurity in an urban West-African setting. The Journal of nutrition 140:2233-2240

10. Freire W, Ramírez M, Belmont P, Mendieta M, Silva K, Romero N, Sáenz K, Pineiros P, Gómez L, Monge R (2013) Encuesta nacional de salud y nutrición. Resumen ejecutivo Quito: MSP, INEC

11. Dop MC, Pereira C, Mistura L, Martinez C, Cardoso E (2012) Using Household Consumption and Expenditures Survey (HCES) data to assess dietary intake in relation to the nutrition transition: a case study from Cape Verde. Food and nutrition bulletin 33:S221-227

12. Mirnalini K, Jr., Zalilah MS, Safiah MY, Tahir A, Siti Haslinda MD, Siti Rohana D, Khairul Zarina MY, Mohd Hasyami S, Normah H (2008) Energy and Nutrient Intakes: Findings from the Malaysian Adult Nutrition Survey (MANS). Malaysian journal of nutrition 14:1-24

13. Kogan L, Abeya-Gilardon E, Mangiolavori G, Biblieri A, Zeni SN (2009) Calcium intake and its relationship to overweight and obesity. Data obtained from the National Survey of Nutrition and Health (ENNyS). BONE 45:S150-S150

14. Varghese JS SS, Minocha S, Kurpad AV, Thomas T Daily adult calcium intake in Indian states based on the NSSO (2012) data (personal communication).

15. Pedro MRA, Benavides-de Leon RC, Barba CV (2009) Dietary changes and their health implications in the Philippines. Annals of Nutrition and Metabolism 55:150

16. Kennedy G, Nantel G, Shetty P (2006) The double burden of malnutrition: case studies from six developing countries. Rome: Nutrition Planning, Assessment and Evaluation Service, Food and Agriculture Organization of the United Nations

17. Perez-Cueto FJ, Naska A, Monterrey J, Almanza-Lopez M, Trichopoulou A, Kolsteren P (2006) Monitoring food and nutrient availability in a nationally representative sample of Bolivian households. The British journal of nutrition 95:555-567

18. Iqbal R, Haroon MA, Dar FJ, Bilgirami M, Bano G, Khan AH (2014) Validation of a food frequency questionnaire for assessing macronutrient and calcium intake in adult Pakistani population. Journal of the College of Physicians and Surgeons--Pakistan : JCPSP 24:224-227

19. Mazengo MC, Simell O, Lukmanji Z, Shirima R, Karvetti RL (1997) Food consumption in rural and urban Tanzania. Acta tropica 68:313-326

20. Steyn NP, Wolmarans P, Nel JH, Bourne LT (2008) National fortification of staple foods can make a significant contribution to micronutrient intake of South African adults. Public health nutrition 11:307-313

21. Lee SE, Song YJ, Kim Y, Choe J, Paik HY (2016) Household food insufficiency is associated with dietary intake in Korean adults. Public health nutrition 19:1112-1121

22. Sharma S, Cao X, Harris R, Hennis AJ, Leske MC, Wu SY (2007) Dietary intake and development of a quantitative food-frequency questionnaire for the Barbados National Cancer Study. Public health nutrition 10:464-470

23. Allen NE, Appleby PN, Key TJ, et al. (2013) Macronutrient intake and risk of urothelial cell carcinoma in the European prospective investigation into cancer and nutrition. International journal of cancer 132:635-644

24. Kamycheva E, Joakimsen RM, Jorde R (2003) Intakes of calcium and vitamin d predict body mass index in the population of Northern Norway. The Journal of nutrition 133:102-106

25. Pobocik RS, Boudreau NS (2005) Nutrient analysis of the Guamanian diet: acceptable energy distribution with inadequate nutrient quality. Pacific health dialog 12:65-77

26. Dicker D, Belnic Y, Goldsmith R, Kaluski DN (2008) Relationship between dietary calcium intake, body mass index, and waist circumference in MABAT--the Israeli National Health and Nutrition Study. The Israel Medical Association journal : IMAJ 10:512-515

27. Araujo MC, Verly Junior E, Junger WL, Sichieri R (2014) Independent associations of income and education with nutrient intakes in Brazilian adults: 2008-2009 National Dietary Survey. Public health nutrition 17:2740-2752

28. Fisberg RM, Marchioni DM, Castro MA, Verly E, Jr., Araujo MC, Bezerra IN, Pereira RA, Sichieri R (2013) Inadequate nutrient intake among the Brazilian elderly: National Dietary Survey 2008-2009. Revista de saude publica 47 Suppl 1:222s-230s

29. Hamdan M, Monteagudo C, Lorenzo-Tovar ML, Tur JA, Olea-Serrano F, Mariscal-Arcas M (2014) Development and validation of a nutritional questionnaire for the Palestine population. Public health nutrition 17:2512-2518

30. Akhtaruzzaman M, Khan MNI, Islam SN (2013) Nutrition, health and demographic survey of Bangladesh-2011. Dhaka: Institute of Nutrition and Food Science University of Dhaka

31. Fukuda Y, Hiyoshi A (2012) High quality nutrient intake is associated with higher household expenditures by Japanese adults. Bioscience trends 6:176-182

32. Wu SJ, Pan WH, Yeh NH, Chang HY (2011) Trends in nutrient and dietary intake among adults and the elderly: from NAHSIT 1993-1996 to 2005-2008. Asia Pacific journal of clinical nutrition 20:251-265

33. Jackson MD, Motswagole BS, Kwape LD, Kobue-Lekalake RI, Rakgantswana TB, Mongwaketse T, Mokotedi M, Jackson-Malete J (2013) Validation and reproducibility of an FFQ for use among adults in Botswana. Public health nutrition 16:1995-2004

34. Konishi S, Watanabe C, Umezaki M, Ohtsuka R (2011) Energy and nutrient intake of Tongan adults estimated by 24-hour recall: the importance of local food items. Ecology of food and nutrition 50:337-350

35. Merabet DH, Reguig KB (2016) Nutritional and metabolic profile in diabetic patients and relationship with metabolic syndrome. Food and Nutrition Sciences 7:155-162

36. Akerele D (2015) Household Food Expenditure Patterns, Food Nutrient Consumption and Nutritional Vulnerability in Nigeria: Implications for Policy. Ecology of food and nutrition 54:546-571

37. Amare B, Moges B, Moges F, Fantahun B, Admassu M, Mulu A, Kassu A (2012) Nutritional status and dietary intake of urban residents in Gondar, Northwest Ethiopia. BMC public health 12:752

38. Ait Ouazar M, Amine M, Harifi G, Ouilki I, Younsi R, Belkhou A, El Bouchti I, El Hassani S (2010) [Evaluation of the calcium intake in population of Marrakesh and its region: 1000 cases]. Annales d'endocrinologie 71:51-55

39. Biró L, Szeitz-Szabó M, Biró G, Sali J (2011) Dietary survey in Hungary, 2009. Part II: Vitamins, macro-and microelements, food supplements and food allergy. Acta Alimentaria 40:301-312

40. Chinnock A (2006) Validation of an estimated food record. Public health nutrition 9:934-941

41. Zaghloul S, Al-Hooti SN, Al-Hamad N, et al. (2013) Evidence for nutrition transition in Kuwait: over-consumption of macronutrients and obesity. Public health nutrition 16:596-607

42. Dehghan M, Martinez S, Zhang X, Seron P, Lanas F, Islam S, Merchant AT (2013) Relative validity of an FFQ to estimate daily food and nutrient intakes for Chilean adults. Public health nutrition 16:1782-1788

43. Duran SA, Ulloa AA, Reyes SG (2014) [Nutrient intake of Chilean older people according to body mass index]. Revista medica de Chile 142:1594-1602

44. Roman Vinas B, Ribas Barba L, Ngo J, Gurinovic M, Novakovic R, Cavelaars A, de Groot LC, van't Veer P, Matthys C, Serra Majem L (2011) Projected prevalence of inadequate nutrient intakes in Europe. Annals of nutrition & metabolism 59:84-95

45. Gimou MM, Charrondiere UR, Leblanc JC, Noel L, Guerin T, Pouillot R (2013) Dietary exposure and health risk assessment for 11 minerals and trace elements in Yaounde: the Cameroonian Total Diet Study. Food additives & contaminants Part A, Chemistry, analysis, control, exposure & risk assessment 30:1556-1572

46. Sette S, Le Donne C, Piccinelli R, Arcella D, Turrini A, Leclercq C (2011) The third Italian National Food Consumption Survey, INRAN-SCAI 2005-06--part 1: nutrient intakes in Italy. Nutrition, metabolism, and cardiovascular diseases : NMCD 21:922-932

47. Fabian E, Elmadfa I (2008) Nutritional situation of the elderly in the European Union: data of the European Nutrition and Health Report (2004). Annals of nutrition & metabolism 52 Suppl 1:57-61

48. Boylan S, Welch A, Pikhart H, et al. (2009) Dietary habits in three Central and Eastern European countries: the HAPIEE study. BMC public health 9:439

49. Sacco JE, Tarasuk V (2009) Health Canada's proposed discretionary fortification policy is misaligned with the nutritional needs of Canadians. The Journal of nutrition 139:1980-1986

50. (2013) National nutrition survey 2010, Singapore. Health Promotion Board,

51. 2011-13 Australian Health Survey (AHS). Australian Bureau of Statistics (ABS) and Food Standards Australia New Zealand (FSANZ). <http://www.abs.gov.au/ausstats/abs@.nsf/mf/4364.0.55.008> 2017

52. Barquera S, Hernandez-Barrera L, Campos-Nonato I, Espinosa J, Flores M, J AB, Rivera JA (2009) Energy and nutrient consumption in adults: analysis of the Mexican National Health and Nutrition Survey 2006. Salud publica de Mexico 51 Suppl 4:S562-573

53. Health. UoOaMo (2011) A Focus on Nutrition: Key findings of the 2008/09 New Zealand Adult Nutrition Survey. Ministry of Health, Wellington

54. Ilow R, Regulska-Ilow B, Rozanska D, et al. (2011) Evaluation of mineral and vitamin intake in the diet of a sample of Polish population - baseline assessment from the prospective cohort 'PONS' study. Annals of agricultural and environmental medicine : AAEM 18:235-240

55. Jackson M, Walker S, Cade J, Forrester T, Cruickshank JK, Wilks R (2001) Reproducibility and validity of a quantitative food-frequency questionnaire among Jamaicans of African origin. Public health nutrition 4:971-980

56. Mensink GB, Fletcher R, Gurinovic M, et al. (2013) Mapping low intake of micronutrients across Europe. The British journal of nutrition 110:755-773

57. Tayyem RF, Abu-Mweis SS, Bawadi HA, Agraib L, Bani-Hani K (2014) Validation of a food frequency questionnaire to assess macronutrient and micronutrient intake among Jordanians. Journal of the Academy of Nutrition and Dietetics 114:1046-1052

58. Heidari Z, Feizi A, Azadbakht L, Sarrafzadegan N (2015) Minerals Intake Distributions in a Large Sample of Iranian at-Risk Population Using the National Cancer Institute Method: Do They Meet Their Requirements? International journal for vitamin and nutrition research Internationale Zeitschrift fur Vitamin- und Ernahrungsforschung Journal international de vitaminologie et de nutrition 85:129-144

59. Vaask S, Pomerleau J, Pudule I, Grinberga D, Abaravicius A, Robertson A, McKee M (2004) Comparison of the Micro-Nutrica Nutritional Analysis program and the Russian Food Composition Database using data from the Baltic Nutrition Surveys. European journal of clinical nutrition 58:573-579

60. Dubuisson C, Lioret S, Touvier M, Dufour A, Calamassi-Tran G, Volatier JL, Lafay L (2010) Trends in food and nutritional intakes of French adults from 1999 to 2007: results from the INCA surveys. The British journal of nutrition 103:1035-1048

61. Fulgoni VL, 3rd, Chu Y, O'Shea M, Slavin JL, DiRienzo MA (2015) Oatmeal consumption is associated with better diet quality and lower body mass index in adults: the National Health and Nutrition Examination Survey (NHANES), 2001-2010. Nutrition research (New York, NY) 35:1052-1059

62. Tetens I, Biltoft-Jensen A, Spagner C, Christensen T, Gille MB, Bugel S, Banke Rasmussen L (2011) Intake of micronutrients among Danish adult users and non-users of dietary supplements. Food & nutrition research 55:

63. Mandic-Puljek M, Mandic ML, Perl A, Kenjeric D (2005) Calcium intake, food sources and seasonal variations in eastern Croatia. Collegium antropologicum 29:503-507

64. Larsson SC, Bergkvist L, Rutegard J, Giovannucci E, Wolk A (2006) Calcium and dairy food intakes are inversely associated with colorectal cancer risk in the Cohort of Swedish Men. The American journal of clinical nutrition 83:667-673; quiz 728-669

65. Larsson SC, Bergkvist L, Wolk A (2009) Long-term dietary calcium intake and breast cancer risk in a prospective cohort of women. The American journal of clinical nutrition 89:277-282

66. Marques-Vidal P, Rousi E, Paccaud F, Gaspoz JM, Theler JM, Bochud M, Stringhini S, Guessous I (2015) Dietary Intake according to Gender and Education: A Twenty-Year Trend in a Swiss Adult Population. Nutrients 7:9558-9572

67. Feeney EL, Nugent AP, Mc Nulty B, Walton J, Flynn A, Gibney ER (2016) An overview of the contribution of dairy and cheese intakes to nutrient intakes in the Irish diet: results from the National Adult Nutrition Survey. The British journal of nutrition 115:709-717

68. Hirvonen T, Tapanainen H, Valsta L, Hannila ML, Aro A, Pietinen P (2006) Efficacy and safety of food fortification with calcium among adults in Finland. Public health nutrition 9:792-797

69. Sluik D, van Lee L, Geelen A, Feskens EJ (2014) Alcoholic beverage preference and diet in a representative Dutch population: the Dutch national food consumption survey 2007-2010. European journal of clinical nutrition 68:287-294

70. Steingrimsdottir L, Gunnarsson O, Indridason OS, Franzson L, Sigurdsson G (2005) Relationship between serum parathyroid hormone levels, vitamin D sufficiency, and calcium intake. Jama 294:2336-2341
